# Supplementary material for: Curating and comparing 114 strain-specific genome-scale metabolic models of Staphylococcus aureus
Source: PubMed Central journal article supplement (PMC8241996; doi:10.1038/s41540-021-00188-4), 2021-06-29
Supplement: 41540_2021_188_MOESM1_ESM.pdf [file 41540_2021_188_MOESM1_ESM.pdf]

## Curating and Comparing 114 Strain-Specific Genome-Scale Metabolic Models of *Staphylococcus aureus*

Alina Renz<sup>1,2,3</sup>  and Andreas Dräger<sup>1,2,3,4,\*</sup> 

<sup>1</sup>Computational Systems Biology of Infections and Antimicrobial-Resistant Pathogens, Institute for Bioinformatics and Medical Informatics (IBMI), University of Tübingen, 72076 Tübingen, Germany

<sup>2</sup>Department of Computer Science, University of Tübingen, 72076 Tübingen, Germany

<sup>3</sup>Cluster of Excellence 'Controlling Microbes to Fight Infections,' University of Tübingen, Germany

<sup>4</sup>German Center for Infection Research (DZIF), partner site Tübingen, Germany

\*Correspondence: [draeger@informatik.uni-tuebingen.de](mailto:draeger@informatik.uni-tuebingen.de)

**Supplementary Table 1. Availability of all models in the *S. aureus* collection, including a direct link to their publication, and the model file(s).** The link to the models refers to the most recent models. In the case of Lee *et al.*, the Path2Model project, and Bosi *et al.*, the models were extensively curated for this study and uploaded to the BioModels Database. The link between these three collections refers to the new version of the files. For all other models, the link points to the resource where the model was initially made available.

| Model Count | Author                     | Year | Link to publication                                                                   | Link(s) to model                                                                                                                                                                                             |
|-------------|----------------------------|------|---------------------------------------------------------------------------------------|--------------------------------------------------------------------------------------------------------------------------------------------------------------------------------------------------------------|
| 1           | Becker <i>et al.</i>       | 2005 | <a href="https://identifiers.org/pubmed:15752426">identifiers.org/pubmed:15752426</a> | <a href="https://identifiers.org/bigg.model:iSB619">identifiers.org/bigg.model:iSB619</a><br><a href="https://identifiers.org/biomodels.db:MODEL1507180070">identifiers.org/biomodels.db:MODEL1507180070</a> |
| 1           | Heinemann <i>et al.</i>    | 2005 | <a href="https://identifiers.org/pubmed:16155945">identifiers.org/pubmed:16155945</a> | <a href="https://identifiers.org/biomodels.db:MODEL1507180072">identifiers.org/biomodels.db:MODEL1507180072</a>                                                                                              |
| 13          | Lee <i>et al.</i>          | 2009 | <a href="https://identifiers.org/pubmed:17038190">identifiers.org/pubmed:17038190</a> | <a href="https://identifiers.org/biomodels.db/MODEL2007150001">identifiers.org/biomodels.db/MODEL2007150001</a>                                                                                              |
| 33          | Path2Models project        | 2013 | <a href="https://identifiers.org/pubmed:24180668">identifiers.org/pubmed:24180668</a> | <a href="https://identifiers.org/biomodels.db/MODEL2007150002">identifiers.org/biomodels.db/MODEL2007150002</a>                                                                                              |
| 64          | Bosi <i>et al.</i>         | 2016 | <a href="https://doi.org/10.1073/pnas.1523199113">doi.org/10.1073/pnas.1523199113</a> | <a href="https://identifiers.org/biomodels.db/MODEL2007110001">identifiers.org/biomodels.db/MODEL2007110001</a>                                                                                              |
| 1           | Magnusdóttir <i>et al.</i> | 2017 | <a href="https://doi.org/10.1038/nbt.3703">doi.org/10.1038/nbt.3703</a>               | <a href="http://www.vmh.life/#microbe/Staphylococcus_aureus_subsp_aureus_USA300_FPR3757">www.vmh.life/#microbe/Staphylococcus_aureus_subsp_aureus_USA300_FPR3757</a>                                         |
| 1           | Seif <i>et al.</i>         | 2019 | <a href="https://identifiers.org/pubmed:30625152">identifiers.org/pubmed:30625152</a> | <a href="https://identifiers.org/bigg.model:iYS854">identifiers.org/bigg.model:iYS854</a>                                                                                                                    |
